# Supplementary material for: Measuring Sustainable Development Efficiency of Urban Logistics Industry
Source: Hindawi journal article supplement (doi:10.1155/2018/9187541), 2018-11-15
Supplement: f1 [file 9187541.f1.pdf]

**S1 Table: Logistics indicator data of thirteen cities in Jiangsu, China.** Staff, total logistics amounts and cargo vehicles are the input indicators; economic added value and carbon dioxide from cargo cars are the original output indicators from the aspects of economic-social development and ecological environment impact, respectively.

| Region      | Staff<br>(Ten thousand) | Total logistics<br>(Trillion Yuan) | Cargo vehicles<br>(Ten thousand) | Economic added<br>value(Billion Yuan) | Carbon dioxide from cargo cars<br>(Ten thousand tons) |
|-------------|-------------------------|------------------------------------|----------------------------------|---------------------------------------|-------------------------------------------------------|
| Nanjing     | 56.74                   | 1.51191                            | 6.877                            | 353.1                                 | 324.21                                                |
| Wuxi        | 57.61                   | 1.746375                           | 8.9311                           | 358.53                                | 214.86                                                |
| Xuzhou      | 47.28                   | 0.479744                           | 8.1255                           | 294.24                                | 437.96                                                |
| Changzhou   | 31.82                   | 1.055296                           | 5.6801                           | 198.01                                | 171.16                                                |
| Suzhou      | 67.31                   | 3.91                               | 8.6376                           | 418.9                                 | 254.26                                                |
| Nantong     | 33.42                   | 1.0565                             | 3.5706                           | 208                                   | 259.43                                                |
| Lianyungang | 21.29                   | 0.296848                           | 2.4646                           | 132.49                                | 165.57                                                |
| Huaian      | 17.98                   | 0.276853                           | 2.6159                           | 111.9                                 | 174.32                                                |
| Yancheng    | 19.05                   | 0.495022                           | 5.0992                           | 118.59                                | 122.5                                                 |
| Zhenjiang   | 14.19                   | 0.46013                            | 2.8291                           | 88.29                                 | 122.38                                                |
| Yangzhou    | 27.08                   | 0.608538                           | 3.2299                           | 353.15                                | 172.33                                                |
| Taizhou     | 16.17                   | 0.545014                           | 2.6993                           | 100.62                                | 83.77                                                 |
| Suqian      | 19.37                   | 0.135026                           | 2.1558                           | 120.57                                | 127.49                                                |
