# Supplementary material for: Measuring Sustainable Development Efficiency of Urban Logistics Industry
Source: Hindawi journal article supplement (doi:10.1155/2018/9187541), 2018-11-15
Supplement: f2 [file 9187541.f2.pdf]

**S2 File: DEA evaluation process.** It includes the following contents: output and input for DEA, efficiency summary, summary of output slacks, summary of input slacks, and projection summary of 13 DMUs.

OUTPUT AND INPUT for DEA

| DMU  | technology efficiency |
|------|-----------------------|
| 1    | 0.477                 |
| 2    | 0.477                 |
| 3    | 0.817                 |
| 4    | 0.544                 |
| 5    | 0.477                 |
| 6    | 0.554                 |
| 7    | 0.771                 |
| 8    | 0.778                 |
| 9    | 0.785                 |
| 10   | 0.866                 |
| 11   | 1.000                 |
| 12   | 1.000                 |
| 13   | 1.000                 |
| mean | 0.734                 |

EFFICIENCY SUMMARY:

| OUTPUT1 | OUTPUT2     | INPUT1 | INPUT2   | INPUT3 |
|---------|-------------|--------|----------|--------|
| 353.1   | 0.003084421 | 56.74  | 1.51191  | 6.877  |
| 358.53  | 0.004654193 | 57.61  | 1.746375 | 8.9311 |
| 294.24  | 0.002283314 | 47.28  | 0.479744 | 8.1255 |
| 198.01  | 0.005842487 | 31.82  | 1.055296 | 5.6801 |
| 418.9   | 0.003932982 | 67.31  | 3.91     | 8.6376 |
| 208     | 0.003854604 | 33.42  | 1.0565   | 3.5706 |
| 132.49  | 0.006039741 | 21.29  | 0.296848 | 2.4646 |
| 111.9   | 0.005736576 | 17.98  | 0.276853 | 2.6159 |
| 118.59  | 0.008163265 | 19.05  | 0.495022 | 5.0992 |
| 88.29   | 0.00817127  | 14.19  | 0.46013  | 2.8291 |
| 353.15  | 0.00580282  | 27.08  | 0.608538 | 3.2299 |
| 100.62  | 0.011937448 | 16.17  | 0.545014 | 2.6993 |
| 120.57  | 0.007843752 | 19.37  | 0.135026 | 2.1558 |

SUMMARY OF OUTPUT SLACKS:

| DMU | output:1 | output:2 |
|-----|----------|----------|
| 1   | 0.000    | 0.003    |
| 2   | 0.000    | 0.001    |
| 3   | 0.000    | 0.012    |

|      |       |       |
|------|-------|-------|
| 4    | 0.000 | 0.000 |
| 5    | 0.000 | 0.003 |
| 6    | 0.000 | 0.000 |
| 7    | 0.000 | 0.000 |
| 8    | 0.000 | 0.000 |
| 9    | 0.000 | 0.000 |
| 10   | 0.000 | 0.000 |
| 11   | 0.000 | 0.000 |
| 12   | 0.000 | 0.000 |
| 13   | 0.000 | 0.000 |
| mean | 0.000 | 0.001 |

SUMMARY OF INPUT SLACKS:

| DMU  | input 1 | input 2 | input 3 |
|------|---------|---------|---------|
| 1    | 0.000   | 0.113   | 0.052   |
| 2    | 0.000   | 0.216   | 0.983   |
| 3    | 0.000   | 0.000   | 2.275   |
| 4    | 0.000   | 0.139   | 0.831   |
| 5    | 0.000   | 1.144   | 0.291   |
| 6    | 2.204   | 0.211   | 0.000   |
| 7    | 0.475   | 0.000   | 0.000   |
| 8    | 0.000   | 0.000   | 0.321   |
| 9    | 0.000   | 0.000   | 1.838   |
| 10   | 0.000   | 0.004   | 0.481   |
| 11   | 0.000   | 0.000   | 0.000   |
| 12   | 0.000   | 0.000   | 0.000   |
| 13   | 0.000   | 0.000   | 0.000   |
| mean | 0.206   | 0.141   | 0.544   |

Results for DMU: 1

Technical efficiency = 0.477

PROJECTION SUMMARY:

| variable | original value | radial movement | slack movement | Projected value |
|----------|----------------|-----------------|----------------|-----------------|
| output 1 | 353.100        | 0.000           | 0.000          | 353.100         |
| output 2 | 0.003          | 0.000           | 0.003          | 0.006           |
| input 1  | 56.740         | -29.664         | 0.000          | 27.076          |
| input 2  | 1.512          | -0.790          | -0.113         | 0.608           |
| input 3  | 6.877          | -3.595          | -0.052         | 3.229           |

Results for DMU: 2

Technical efficiency = 0.477

PROJECTION SUMMARY:

| variable | original value | radial movement | slack movement | Projected value |
|----------|----------------|-----------------|----------------|-----------------|
| output 1 | 358.530        | 0.000           | 0.000          | 358.530         |
| output 2 | 0.005          | 0.000           | 0.001          | 0.006           |
| input 1  | 57.610         | -30.117         | 0.000          | 27.493          |
| input 2  | 1.746          | -0.913          | -0.216         | 0.618           |
| input 3  | 8.931          | -4.669          | -0.983         | 3.279           |

Results for DMU: 3

Technical efficiency = 0.817

PROJECTION SUMMARY:

| variable | original value | radial movement | slack movement | Projected value |
|----------|----------------|-----------------|----------------|-----------------|
| output 1 | 294.240        | 0.000           | 0.000          | 294.240         |
| output 2 | 0.002          | 0.000           | 0.012          | 0.014           |
| input 1  | 47.280         | -8.672          | 0.000          | 38.608          |
| input 2  | 0.480          | -0.088          | 0.000          | 0.392           |
| input 3  | 8.126          | -1.490          | -2.275         | 4.360           |

Results for DMU: 4

Technical efficiency = 0.544

PROJECTION SUMMARY:

| variable | original value | radial movement | slack movement | Projected value |
|----------|----------------|-----------------|----------------|-----------------|
| output 1 | 198.010        | 0.000           | 0.000          | 198.010         |
| output 2 | 0.006          | 0.000           | 0.000          | 0.006           |
| input 1  | 31.820         | -14.508         | 0.000          | 17.312          |
| input 2  | 1.055          | -0.481          | -0.139         | 0.435           |
| input 3  | 5.680          | -2.590          | -0.831         | 2.259           |

Results for DMU: 5

Technical efficiency = 0.477

PROJECTION SUMMARY:

| variable | original value | radial movement | slack movement | Projected value |
|----------|----------------|-----------------|----------------|-----------------|
| output 1 | 418.900        | 0.000           | 0.000          | 418.900         |
| output 2 | 0.004          | 0.000           | 0.003          | 0.007           |
| input 1  | 67.310         | -35.188         | 0.000          | 32.122          |
| input 2  | 3.910          | -2.044          | -1.144         | 0.722           |
| input 3  | 8.638          | -4.516          | -0.291         | 3.831           |

Results for DMU: 6  
 Technical efficiency = 0.554  
 PROJECTION SUMMARY:

| variable | original value | radial movement | slack movement | Projected value |
|----------|----------------|-----------------|----------------|-----------------|
| output 1 | 208.000        | 0.000           | 0.000          | 208.000         |
| output 2 | 0.004          | 0.000           | 0.000          | 0.004           |
| input 1  | 33.420         | -14.907         | -2.204         | 16.309          |
| input 2  | 1.056          | -0.471          | -0.211         | 0.374           |
| input 3  | 3.571          | -1.593          | 0.000          | 1.978           |

Results for DMU: 7  
 Technical efficiency = 0.771  
 PROJECTION SUMMARY:

| variable | original value | radial movement | slack movement | Projected value |
|----------|----------------|-----------------|----------------|-----------------|
| output 1 | 132.490        | 0.000           | 0.000          | 132.490         |
| output 2 | 0.006          | 0.000           | 0.000          | 0.006           |
| input 1  | 21.290         | -4.886          | -0.475         | 15.929          |
| input 2  | 0.297          | -0.068          | 0.000          | 0.229           |
| input 3  | 2.465          | -0.566          | 0.000          | 1.899           |

Results for DMU: 8  
 Technical efficiency = 0.778  
 PROJECTION SUMMARY:

| variable | original value | radial movement | slack movement | Projected value |
|----------|----------------|-----------------|----------------|-----------------|
| output 1 | 111.900        | 0.000           | 0.000          | 111.900         |
| output 2 | 0.006          | 0.000           | 0.000          | 0.006           |
| input 1  | 17.980         | -3.990          | 0.000          | 13.990          |
| input 2  | 0.277          | -0.061          | 0.000          | 0.215           |
| input 3  | 2.616          | -0.581          | -0.321         | 1.714           |

Results for DMU: 9  
 Technical efficiency = 0.785  
 PROJECTION SUMMARY:

| variable | original value | radial movement | slack movement | Projected value |
|----------|----------------|-----------------|----------------|-----------------|
| output 1 | 118.590        | 0.000           | 0.000          | 118.590         |

|          |        |        |        |        |
|----------|--------|--------|--------|--------|
| output 2 | 0.008  | 0.000  | 0.000  | 0.008  |
| input 1  | 19.050 | -4.096 | 0.000  | 14.954 |
| input 2  | 0.495  | -0.106 | 0.000  | 0.389  |
| input 3  | 5.099  | -1.096 | -1.838 | 2.165  |

Results for DMU: 10

Technical efficiency = 0.866

PROJECTION SUMMARY:

| variable | original value | radial movement | slack movement | Projected value |
|----------|----------------|-----------------|----------------|-----------------|
| output 1 | 88.290         | 0.000           | 0.000          | 88.290          |
| output 2 | 0.008          | 0.000           | 0.000          | 0.008           |
| input 1  | 14.190         | -1.895          | 0.000          | 12.295          |
| input 2  | 0.460          | -0.061          | -0.004         | 0.395           |
| input 3  | 2.829          | -0.378          | -0.481         | 1.970           |

Results for DMU: 11

Technical efficiency = 1.000

PROJECTION SUMMARY:

| variable | original value | radial movement | slack movement | Projected value |
|----------|----------------|-----------------|----------------|-----------------|
| output 1 | 353.150        | 0.000           | 0.000          | 353.150         |
| output 2 | 0.006          | 0.000           | 0.000          | 0.006           |
| input 1  | 27.080         | 0.000           | 0.000          | 27.080          |
| input 2  | 0.609          | 0.000           | 0.000          | 0.609           |
| input 3  | 3.230          | 0.000           | 0.000          | 3.230           |

Results for DMU: 12

Technical efficiency = 1.000

PROJECTION SUMMARY:

| variable | original value | radial movement | slack movement | Projected value |
|----------|----------------|-----------------|----------------|-----------------|
| output 1 | 100.620        | 0.000           | 0.000          | 100.620         |
| output 2 | 0.012          | 0.000           | 0.000          | 0.012           |
| input 1  | 16.170         | 0.000           | 0.000          | 16.170          |
| input 2  | 0.545          | 0.000           | 0.000          | 0.545           |
| input 3  | 2.699          | 0.000           | 0.000          | 2.699           |

Results for DMU: 13

Technical efficiency = 1.000

PROJECTION SUMMARY:

| variable | original value | radial movement | slack movement | Projected value |
|----------|----------------|-----------------|----------------|-----------------|
| output 1 | 120.570        | 0.000           | 0.000          | 120.570         |
| output 2 | 0.008          | 0.000           | 0.000          | 0.008           |
| input 1  | 19.370         | 0.000           | 0.000          | 19.370          |
| input 2  | 0.135          | 0.000           | 0.000          | 0.135           |
| input 3  | 2.156          | 0.000           | 0.000          | 2.156           |
