# Supplementary material for: Measuring Sustainable Development Efficiency of Urban Logistics Industry
Source: Hindawi journal article supplement (doi:10.1155/2018/9187541), 2018-11-15
Supplement: f3 [file 9187541.f3.pdf]

**S3 Table: DEA-LDA evaluation.** When the same data (input, output and efficiency level) are applied to LDA (linear discriminant analysis), LDA evaluation value are obtained.

| Region      | INPUT1 | INPUT2   | INPUT3 | OUTPUT1 | OUTPUT2     | Efficiency level | LDA evaluation value |
|-------------|--------|----------|--------|---------|-------------|------------------|----------------------|
| Nanjing     | 56.74  | 1.51191  | 6.877  | 353.1   | 0.003084421 | Inefficient      | 3.721673707          |
| Wuxi        | 57.61  | 1.746375 | 8.9311 | 358.53  | 0.004654193 | Inefficient      | 3.565227048          |
| Xuzhou      | 47.28  | 0.479744 | 8.1255 | 294.24  | 0.002283314 | Inefficient      | 2.6502694            |
| Changzhou   | 31.82  | 1.055296 | 5.6801 | 198.01  | 0.005842487 | Inefficient      | 3.036094877          |
| Suzhou      | 67.31  | 3.91     | 8.6376 | 418.9   | 0.003932982 | Inefficient      | 2.850844097          |
| Nantong     | 33.42  | 1.0565   | 3.5706 | 208     | 0.003854604 | Inefficient      | 3.127397976          |
| Lianyungang | 21.29  | 0.296848 | 2.4646 | 132.49  | 0.006039741 | Inefficient      | 3.73096867           |
| Huaian      | 17.98  | 0.276853 | 2.6159 | 111.9   | 0.005736576 | Inefficient      | 3.208854801          |
| Yancheng    | 19.05  | 0.495022 | 5.0992 | 118.59  | 0.008163265 | Inefficient      | 3.295640445          |
| Zhenjiang   | 14.19  | 0.46013  | 2.8291 | 88.29   | 0.00817127  | Inefficient      | 3.645533171          |
| Yangzhou    | 27.08  | 0.608538 | 3.2299 | 353.15  | 0.00580282  | Efficient        | 5.497686702          |
| Taizhou     | 16.17  | 0.545014 | 2.6993 | 100.62  | 0.011937448 | Efficient        | 5.462100067          |
| Suqian      | 19.37  | 0.135026 | 2.1558 | 120.57  | 0.007843752 | Efficient        | 4.532680409          |
